# Supplementary material
Source: PubMed Central journal article supplement (PMC219478)
Supplement: nar_31_20_5858__1.pdf [file nar_31_20_5858__1.pdf]

## **SUPPLEMENTARY MATERIAL**

**Table S1.** RESP derived atomic charges and atom types for  $\alpha$ -L-LNA thymine monomer

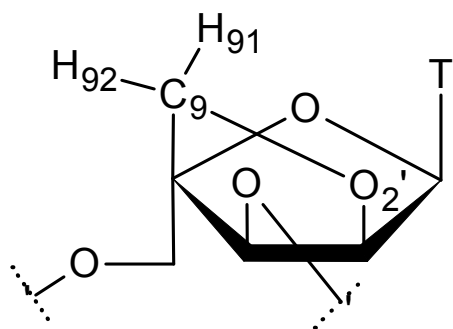

AMBER atom types differing from standard DNA

| atom | atom type |
|------|-----------|
| H2'  | H1        |
| O2'  | OS        |
| C9   | CT        |
| H91  | H1        |
| H92  | H1        |

| atom | charge  | atom | charge  | atom | charge  |
|------|---------|------|---------|------|---------|
| O5'  | -0.5176 | H3'  | 0.0962  | C5   | 0.0251  |
| C5'  | 0.0176  | O2'  | -0.4268 | C6   | -0.2612 |
| H5'  | 0.0974  | C9   | 0.0613  | O2   | -0.5504 |
| H5'' | 0.0974  | H91  | 0.1025  | H3   | 0.3259  |
| C1'  | -0.0166 | H92  | 0.1025  | O4   | -0.5473 |
| C2'  | 0.1170  | O3'  | -0.4991 | H6   | 0.2118  |
| C3'  | 0.1525  | N1   | -0.0320 | C7   | -0.2483 |
| C4'  | 0.1439  | C2   | 0.5645  | H71  | 0.0876  |
| O4'  | -0.3603 | N3   | -0.4280 | H72  | 0.0876  |
| H1'  | 0.1856  | C4   | 0.5639  | H73  | 0.0876  |
| H2'  | 0.1455  |      |         |      |         |

**Table S2.** A selection of chemical shifts (in ppm) for the d(C<sup>α</sup>L<sup>L</sup>GA<sup>α</sup>L<sup>L</sup>A<sup>α</sup>L<sup>L</sup>GC):r(GCAUAUCAG) hybrid. Values are given at 25°C relative to DSS or inorganic phosphorous. <sup>a</sup>

|                               | H6/H8 | H1'  | H2'  | H2'' | H3'  | H4'  | H5/H2/CH <sub>3</sub> | H1/H3 | <sup>31</sup> P |
|-------------------------------|-------|------|------|------|------|------|-----------------------|-------|-----------------|
| C1                            | 7.81  | 6.28 | 2.39 | 2.91 | 4.85 | 4.19 | 5.99                  |       |                 |
| <sup>α</sup> L <sup>L</sup> 2 | 7.41  | 5.71 | 5.00 |      | 4.82 |      | 1.78                  | –     | –3.95           |
| G3                            | 7.70  | 5.93 | 2.25 | 2.67 | 4.71 | 4.42 |                       | 11.98 | –4.44           |
| A4                            | 8.14  | 6.32 | 2.75 | 3.05 | 5.07 | 4.50 | 7.73                  |       | –3.99           |
| <sup>α</sup> L <sup>L</sup> 5 | 6.79  | 5.41 | 4.68 |      | 4.77 |      | 1.55                  | 13.59 | –4.18           |
| A6                            | 8.02  | 6.27 | 2.55 | 2.97 | 4.78 | 4.45 | 7.25                  |       | –4.22           |
| <sup>α</sup> L <sup>L</sup> 7 | 6.81  | 5.49 | 4.89 |      | 4.77 |      | 1.36                  | 13.38 | –4.16           |
| G8                            | 7.54  | 6.04 | 2.35 | 2.64 | 4.52 | 4.38 |                       | 12.46 | –4.87           |
| C9                            | 7.41  | 6.15 | 2.09 | 2.30 | 4.44 | 4.08 | 5.12                  |       | –4.02           |
| G10                           | 7.91  | 5.55 | 4.66 |      | 4.48 | 4.22 |                       | –     |                 |
| C11                           | 7.80  | 5.55 | 4.66 |      | 4.57 | 4.47 | 5.29                  |       | –3.90           |
| A12                           | 8.01  | 5.97 | 4.48 |      | 4.64 | 4.52 | 7.14                  |       | –3.41           |
| U13                           | 7.48  | 5.43 | 4.62 |      | 4.42 | 4.45 | 5.07                  | 12.89 | –3.93           |
| A14                           | 8.09  | 5.93 | 4.40 |      | 4.62 | 4.54 | 6.81                  |       | –3.65           |
| U15                           | 7.59  | 5.45 | 4.35 |      | 4.39 | 4.39 | 4.85                  | 13.44 | –4.23           |
| C16                           | 7.98  | 5.61 | 4.52 |      | 4.58 | 4.43 | 5.67                  |       | –4.02           |
| A17                           | 8.00  | 5.83 | 4.30 |      | 4.70 | 4.45 | 6.93                  |       | –3.53           |
| G18                           | 7.34  | 5.77 | 3.99 |      | 4.21 | 4.47 |                       | –     | –3.81           |

<sup>a</sup> The protons in the C2',C4' linker (H6' and H6'') have the following chemical shift values:

<sup>α</sup>L<sup>L</sup>2: 4.36/4.44; <sup>α</sup>L<sup>L</sup>5: 4.31/4.31; <sup>α</sup>L<sup>L</sup>7: 4.24/4.24.

**Table S3.** A selection of helix parameters for the  $\alpha$ -L-LNA:RNA hybrid. Values for standard A- and B-type duplexes are included for comparison

|                  | X-disp<br>(Å) | Y-disp<br>(Å) | Tip<br>(°) | Inclin<br>(°) | Prop.Twist<br>(°) |       | Twist<br>(°) | Roll<br>(°) | Rise<br>(Å) |
|------------------|---------------|---------------|------------|---------------|-------------------|-------|--------------|-------------|-------------|
| C1               | -3.80         | 0.54          | 4.01       | 13.7          | -10.5             | C1-T2 | 23.3         | -4.24       | 2.85        |
| $\alpha^L T^L 2$ | -3.75         | 0.21          | 2.52       | 15.9          | -18.0             | T2-G3 | 37.5         | 20.98       | 2.23        |
| G3               | -3.81         | 0.01          | 7.53       | 15.8          | -20.0             | G3-A4 | 35.5         | -3.78       | 2.70        |
| A4               | -3.81         | 0.29          | 4.45       | 14.2          | -15.0             | A4-T5 | 26.3         | -6.27       | 3.09        |
| $\alpha^L T^L 5$ | -3.56         | -0.11         | 2.22       | 10.1          | -11.4             | T5-A6 | 38.4         | 5.25        | 2.65        |
| A6               | -3.55         | -0.01         | 3.94       | 9.4           | -20.6             | A6-T7 | 29.4         | -4.07       | 3.00        |
| $\alpha^L T^L 7$ | -3.48         | -0.32         | 3.44       | 10.1          | -19.8             | T7-G8 | 40.4         | 7.19        | 2.85        |
| G8               | -3.46         | -0.29         | 5.68       | 10.6          | -16.2             | G8-C9 | 31.1         | -4.81       | 2.85        |
| C9               | -3.39         | -0.18         | 3.92       | 11.2          | -9.6              |       |              |             |             |
| A-type           | -5.4          | 0             | 0          | 19.1          | -13.7             |       | 32.7         | 0           | 2.56        |
| B-type           | -0.7          | 0             | 0          | -5.9          | -3.7              |       | 36.0         | 0           | 3.38        |

**Table S4.** Backbone torsion angles and sugar puckers (in degrees) in the *in vacuo* structure of the  $\alpha$ -L-LNA:RNA hybrid

|                  | $\alpha$ | $\beta$ | $\gamma$         | $\delta$ | $\epsilon$ | $\zeta$ | $\chi$ | $\phi_{\max}$ | P   |
|------------------|----------|---------|------------------|----------|------------|---------|--------|---------------|-----|
| C1               |          |         | 47               | 131      | 137        | -63     | -103   | 28            | 168 |
| $\alpha^L T^L 2$ | -172     | 203     | 182              | -62      | 174        | 49      | -125   | 67            | 14  |
| G3               | 116      | 153     | 160              | 114      | -176       | -76     | -151   | 18            | 123 |
| A4               | -78      | 186     | 48               | 133      | -166       | -89     | -105   | 34            | 157 |
| $\alpha^L T^L 5$ | -85      | 154     | 172              | -63      | 178        | 56      | -158   | 61            | 16  |
| A6               | -161     | 190     | 80               | 115      | -166       | -81     | -121   | 37            | 129 |
| $\alpha^L T^L 7$ | -101     | 163     | 172              | -64      | 176        | 65      | -150   | 61            | 16  |
| G8               | -135     | 183     | 50               | 106      | -170       | -78     | -143   | 22            | 95  |
| C9               | -77      | 172     | 57               | 100      |            |         | -130   | 29            | 88  |
| G10              |          |         | <del>59</del> 59 | 80       | -125       | -91     | -171   | 0.377         | 7   |
| C11              | -66      | 145     | 65               | 79       | -160       | -66     | -156   | 41            | 9   |
| A12              | -78      | 177     | 58               | 79       | -164       | -62     | -159   | 42            | 6   |
| U13              | -80      | 176     | 69               | 78       | -159       | -65     | -158   | 40            | 3   |
| A14              | -76      | 178     | 57               | 81       | -173       | -61     | -157   | 40            | 6   |
| U15              | -79      | 178     | 80               | 82       | -159       | -62     | -152   | 37            | 2   |
| C16              | -77      | 172     | 55               | 79       | -152       | -58     | -146   | 39            | 9   |
| A17              | -76      | 186     | 36               | 76       | -177       | -63     | -155   | 37            | 16  |
| G18              | -76      | 170     | 64               | 72       |            |         | -160   | 44            | 12  |
